# Supplementary material
Source: publisher figshare collection journal article supplement (https://adisjournals.figshare.com/articles/dataset/_/14179409)
Supplement: Supplementary file 1 [file 2]

## Multiple Sclerosis Patients Treated With Diroximel Fumarate in the Real-World Setting Have High Rates of Persistence and Adherence

Liseno, J., Lager, B., Miller, C. et al. Neurol Ther (2021). <https://doi.org/10.1007/s40120-021-00242-7>

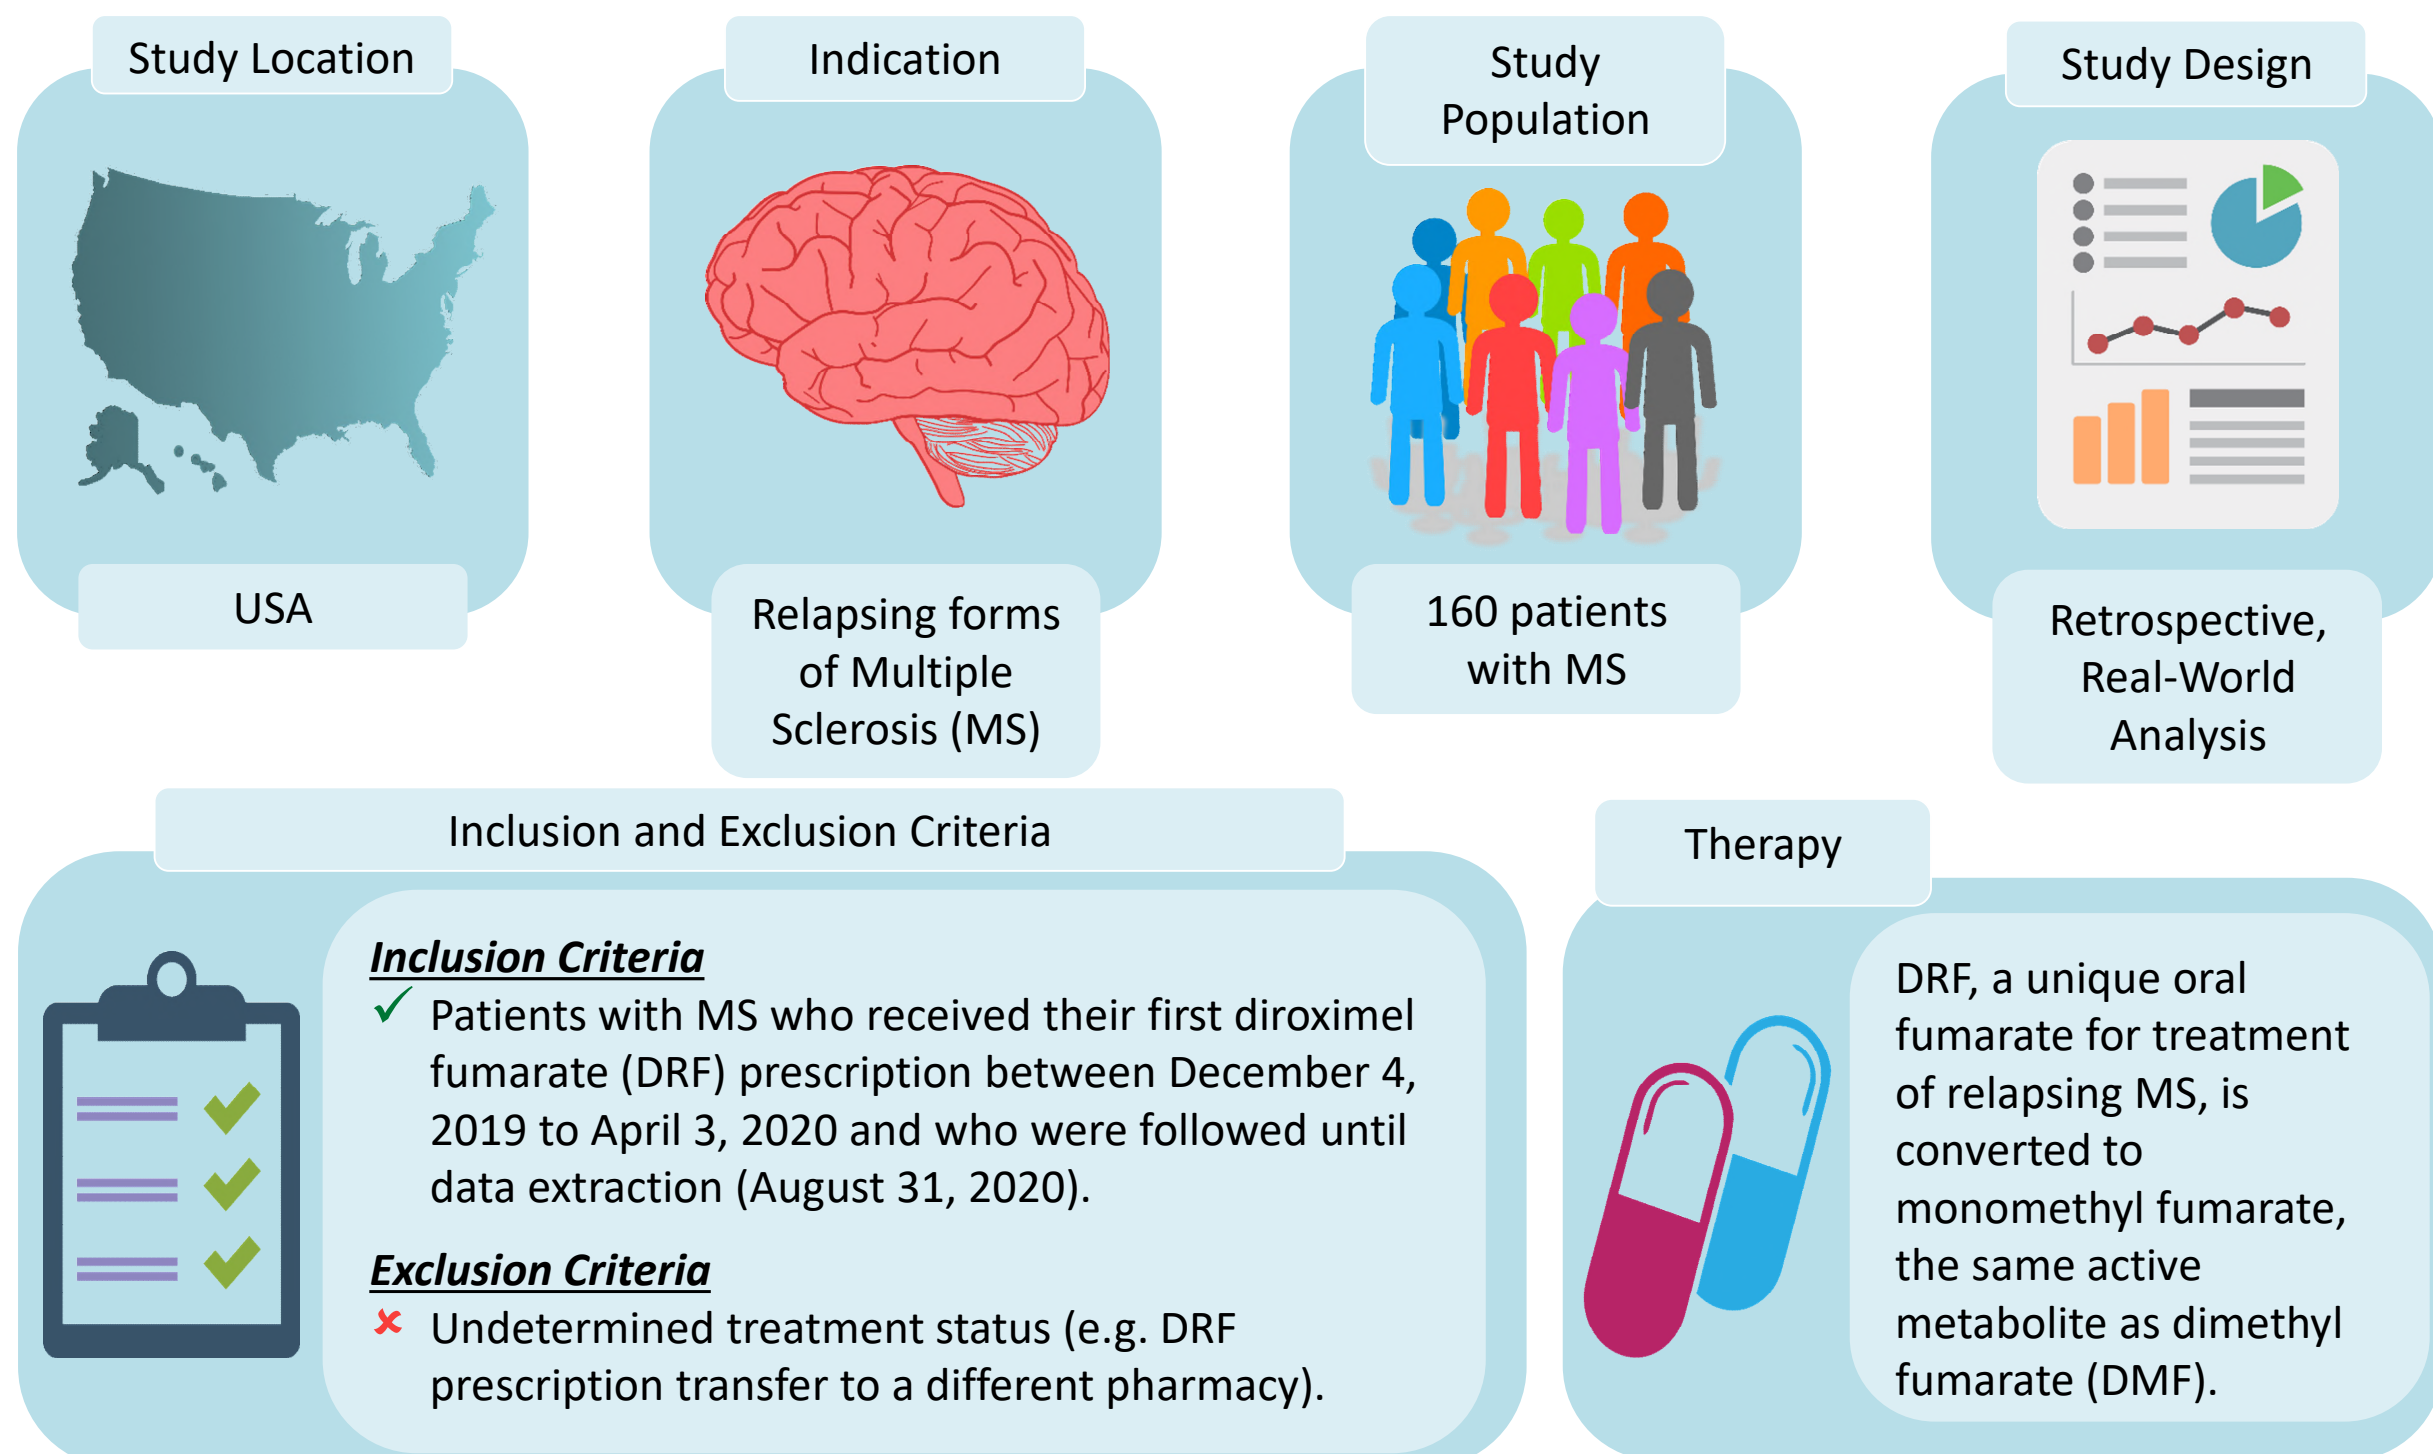

### Why carry out this study?

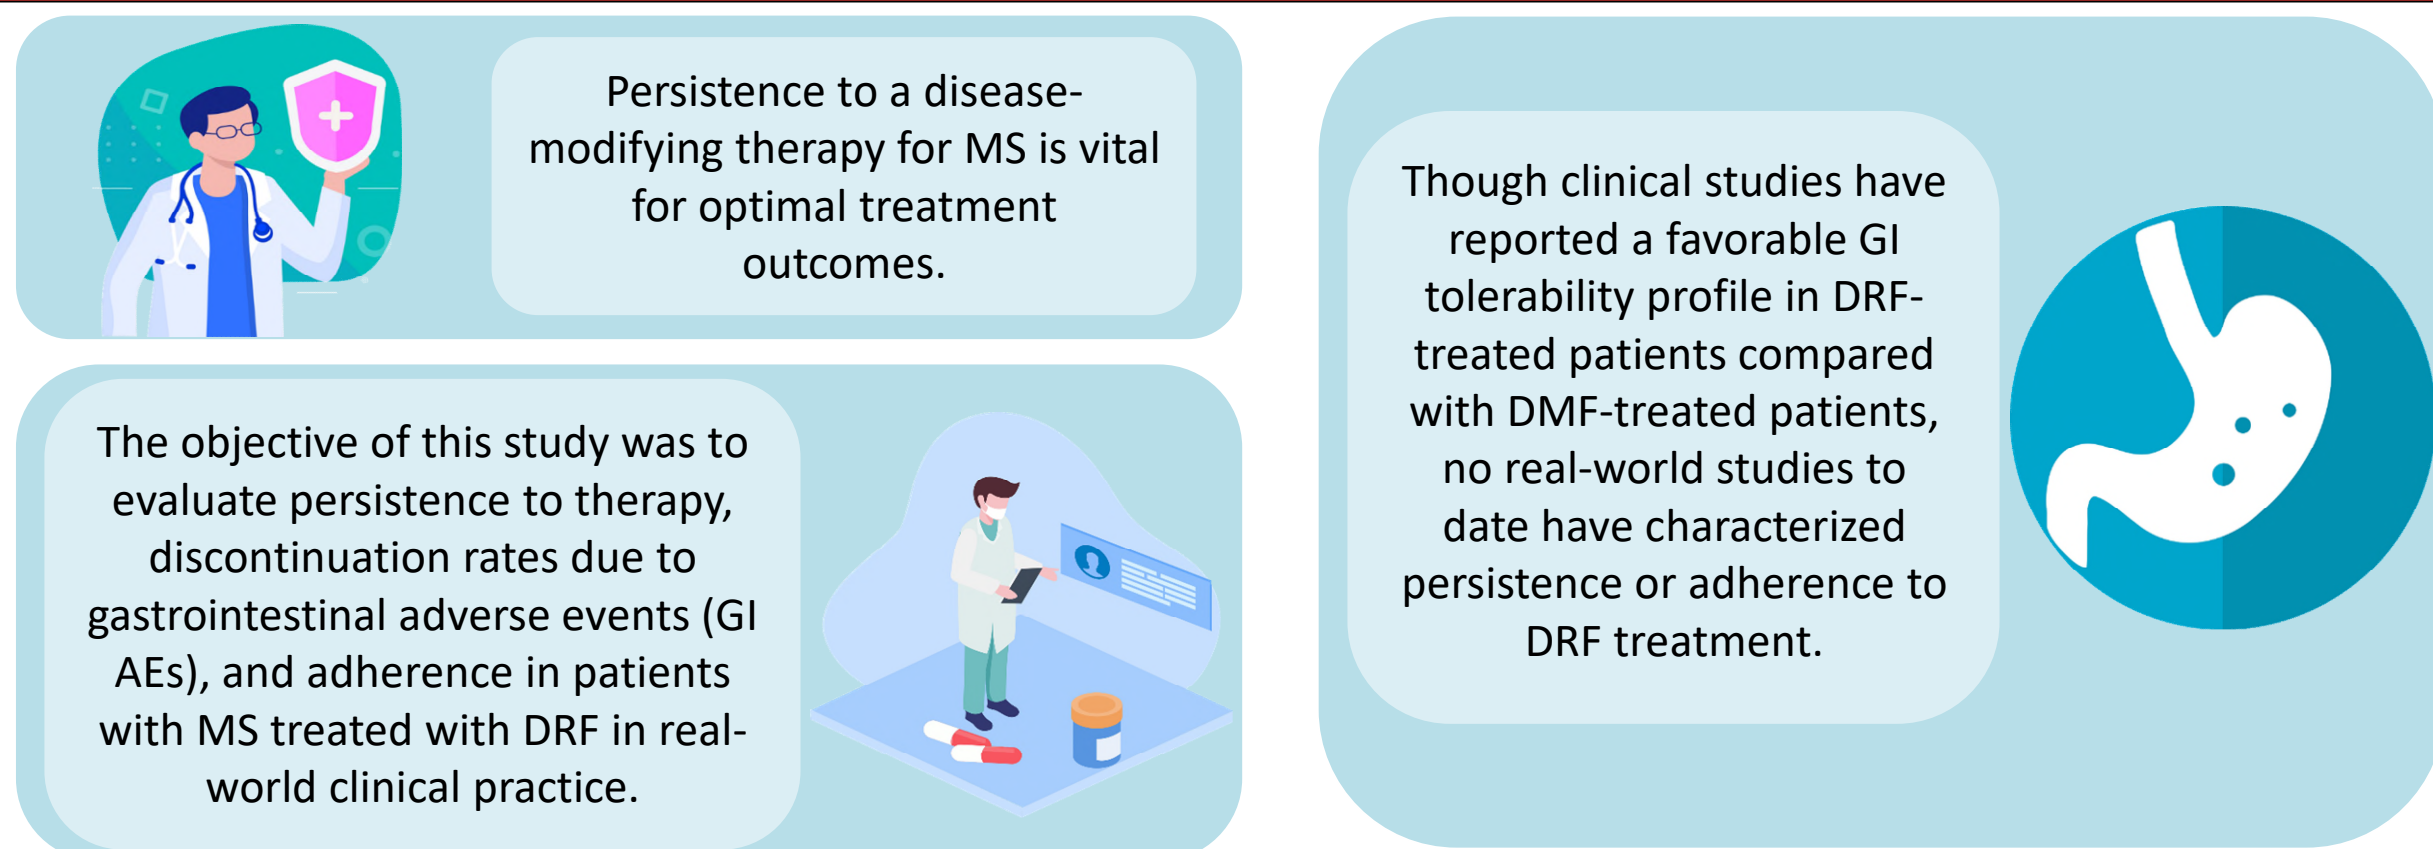

### What was learned from the study?

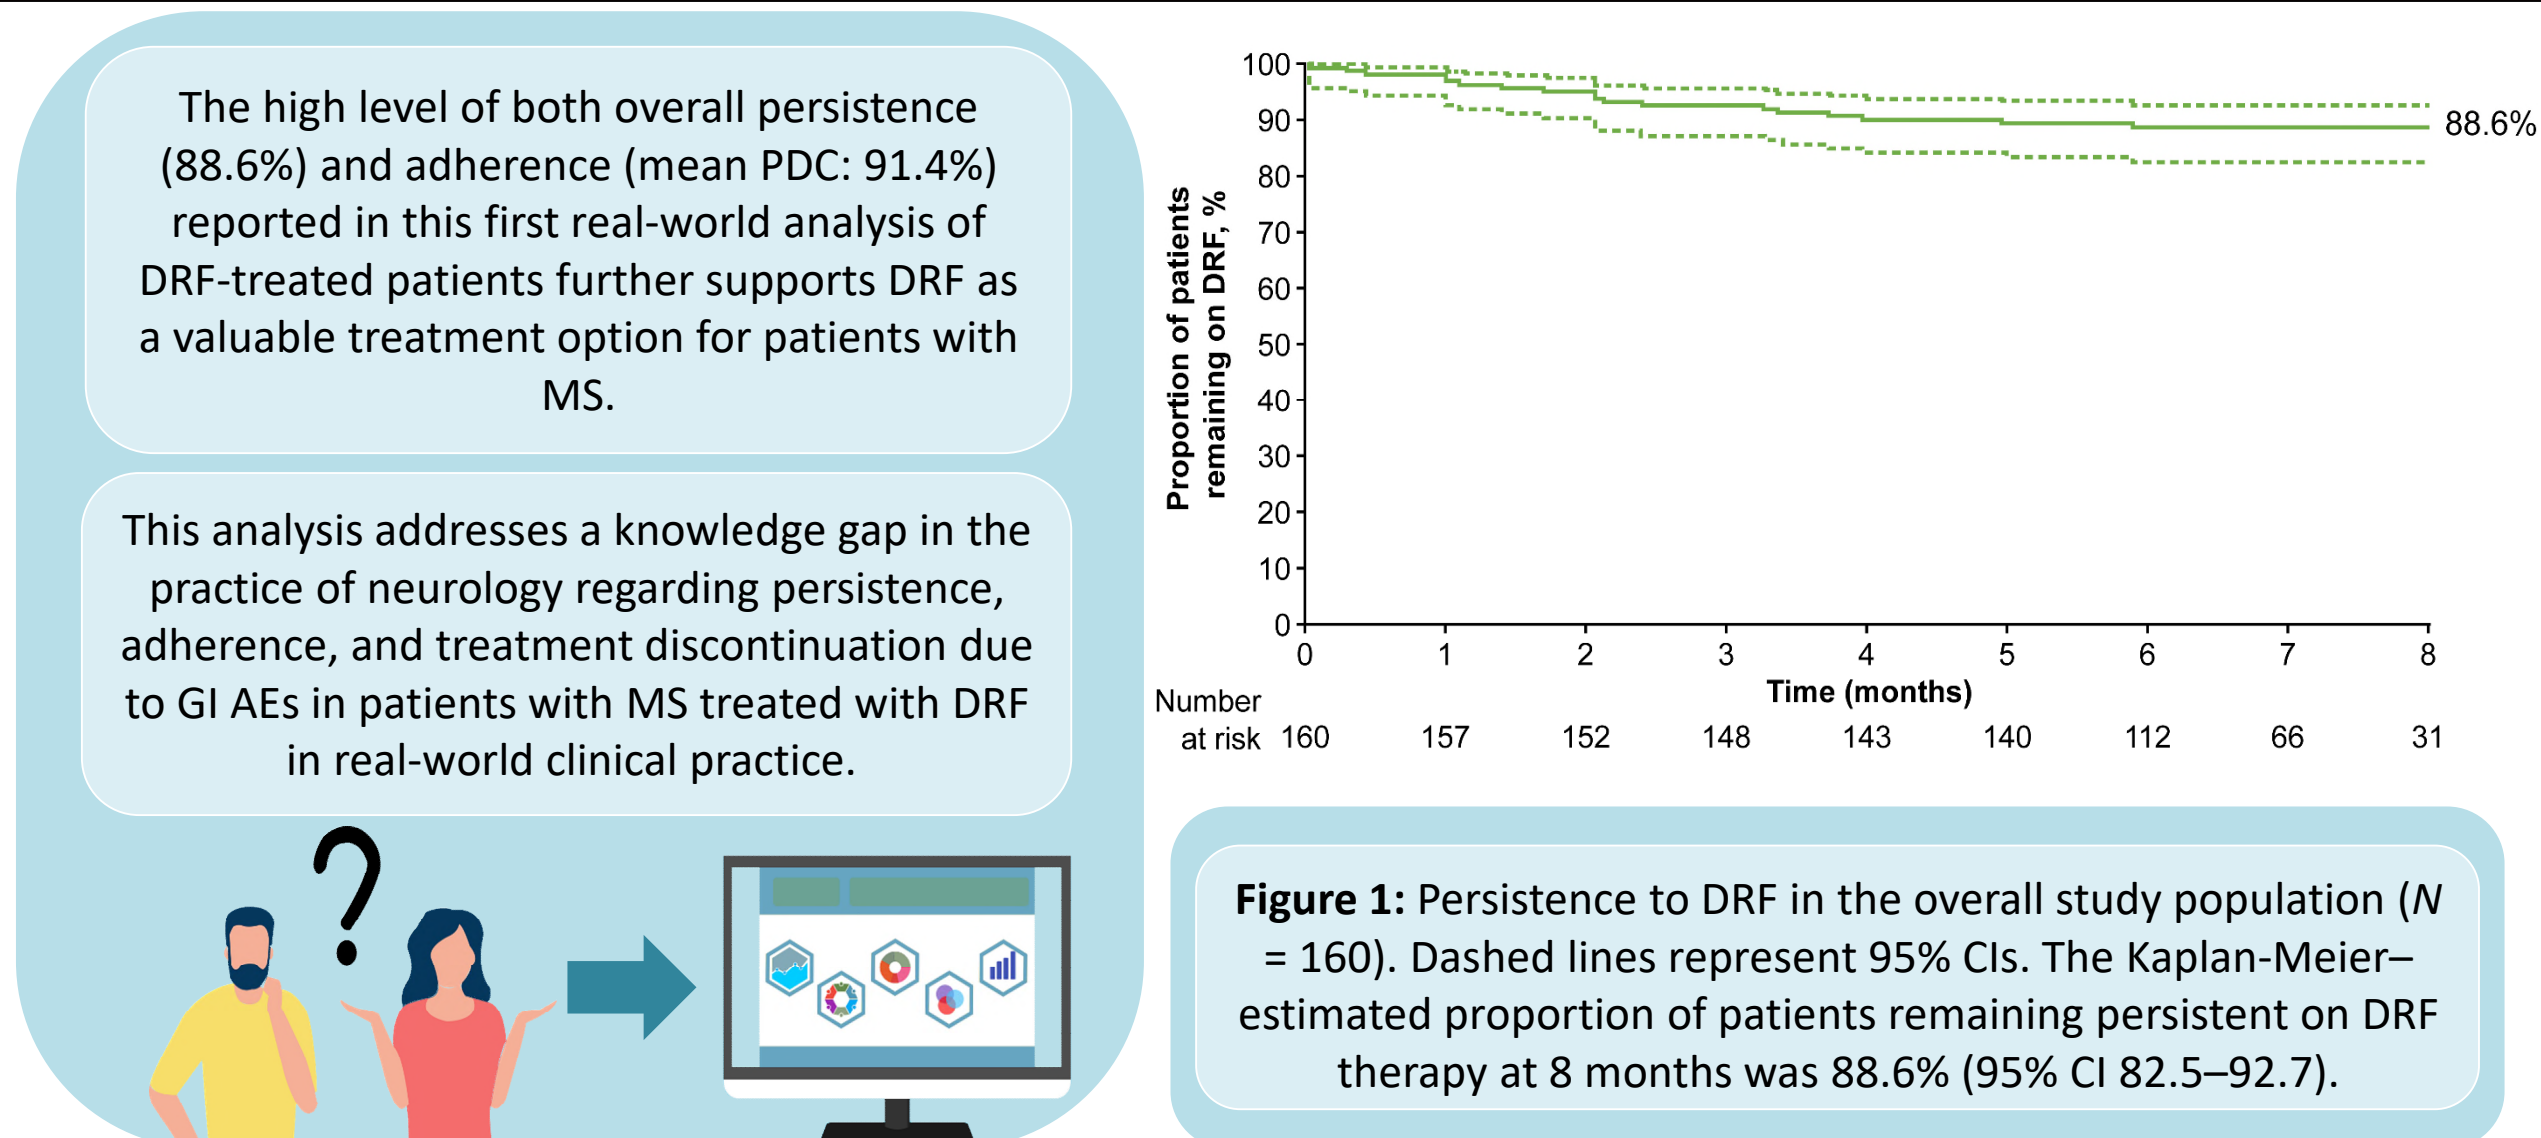

#### Abbreviations:

MS = Multiple Sclerosis; DRF = Diroximel Fumarate; DMF = Dimethyl Fumarate; GI = Gastrointestinal; AE = Adverse events; PDC = Proportion of days covered; CI = Confidence interval
